# Supplementary material for: Real-time regeneration of a working zeolite monitored via operando X-ray diffraction and crystallographic imaging: how coke flees the MFI framework
Source: Royal Society of Chemistry journal article supplement (doi:10.1039/d2dt02845j), 2022-01-01
Supplement: d2dt02845j1.pdf [file d2dt02845j1.pdf]

## Real-time regeneration of a working zeolite monitored *via operando* X-ray diffraction and crystallographic imaging: How coke flees the MFI framework

Georgios N. Kalantzopoulos<sup>[a]</sup>, Daniel Rojo Gama<sup>[a]</sup>, Dimitrios K. Pappas<sup>[a]</sup>, Iurii, Dovgaliuk<sup>[c, d]</sup>, Unni Olsbye<sup>[a]</sup>, Pablo Beato<sup>[b]</sup>, Lars F. Lundegaard<sup>[b]</sup>, David S. Wragg<sup>[a]</sup> and Stian Svelle<sup>\*[a]</sup>

<sup>[a]</sup> Center for Materials Science and Nanotechnology (SMN), Department of Chemistry, University of Oslo, P.O. Box 1033, Blindern, N-0315 Oslo, Norway

<sup>[b]</sup> Haldor Topsøe A/S, Haldor Topsøes Allé 1, 2800 Kgs. Lyngby, Denmark

<sup>[c]</sup> Swiss-Norwegian Beamline at the European Synchrotron Facility, 71 avenue des Martyrs, F-38000, Grenoble, France.

<sup>[d]</sup> Institut des Matériaux Poreux de Paris, Département de Chimie, ENS - UMR 8004 CNRS-ENS-ESPCI, 24 rue Lhomond, 75005 Paris, France.

Corresponding author : Prof. Stian Svelle, [stian.svelle@kjemi.uio.no](mailto:stian.svelle@kjemi.uio.no)

### Table of contents

1. Basic material characterization
  - a. Brønsted acidity, Si/Al ratio
  - b. Textural material properties
  - c. SEM
2. MTG monitored *via operando* PXRD
3. Temperature-programmed oxidation (TPO) monitored *via operando* XRD
  - a. MS signal for CO<sub>2</sub>, evolution of the (*a-b*) parameter and unit cell volume evolution at increasing TOS for the H-ZSM-5 catalyst
  - b. Full scale evolution of individual coke occupancies within the ZSM-5 framework at increasing TOS and increasing temperature for the H-ZSM-5 catalyst
  - c. Preferred sites of coke accumulation in the straight and sinusoidal channel.

## 1. Basic material characterization

### a) Brønsted acidity, Si/Al ratio

**Table S1.** Si/Al ratio and Brønsted acidity for the H-ZSM-5 sample.

| Sample  | Si/Al* | Brønsted Acidity<br>(mmol/g)** |
|---------|--------|--------------------------------|
| H-ZSM-5 | 37     | 0.416                          |

\* Determined by in-house ICP analysis.

\*\*Determined by in-house FTIR measurements.

### b) Textural properties defined by N<sub>2</sub> physisorption and SEM.

**Table S2.** Summary of the BET surface area, external surface area, total pore volume and micropore volume of the H-ZSM-5 system as calculated by the N<sub>2</sub> physisorption measurements. The particle size has been averaged from SEM images.

| Sample  | N <sub>2</sub> physisorption          |                                                    |                                                         |                                                        | SEM                   |
|---------|---------------------------------------|----------------------------------------------------|---------------------------------------------------------|--------------------------------------------------------|-----------------------|
|         | BET (m <sup>2</sup> g <sup>-1</sup> ) | External area<br>(m <sup>2</sup> g <sup>-1</sup> ) | Total pore<br>volume (cm <sup>3</sup> g <sup>-1</sup> ) | Micropore<br>volume (cm <sup>3</sup> g <sup>-1</sup> ) | Particle size<br>(μm) |
| H-ZSM-5 | 414                                   | 4                                                  | 0.20                                                    | 0.18                                                   | 2-4                   |

c) Scanning Electron Microscopy (SEM)

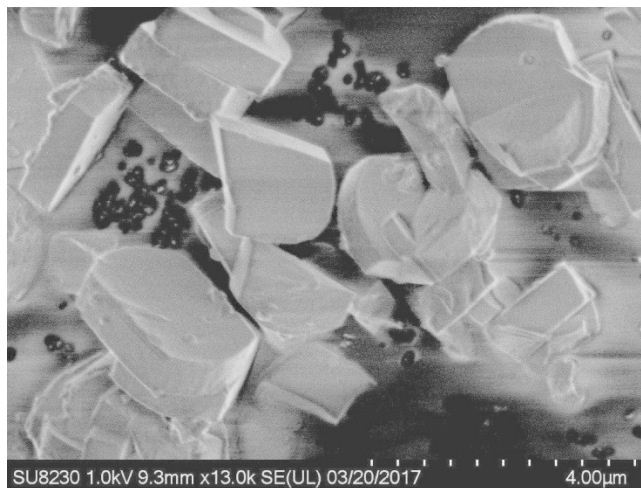

**Figure S1.** SEM image of the H-ZSM-5 sample.

## 2. MTG monitored *via operando* PXRD

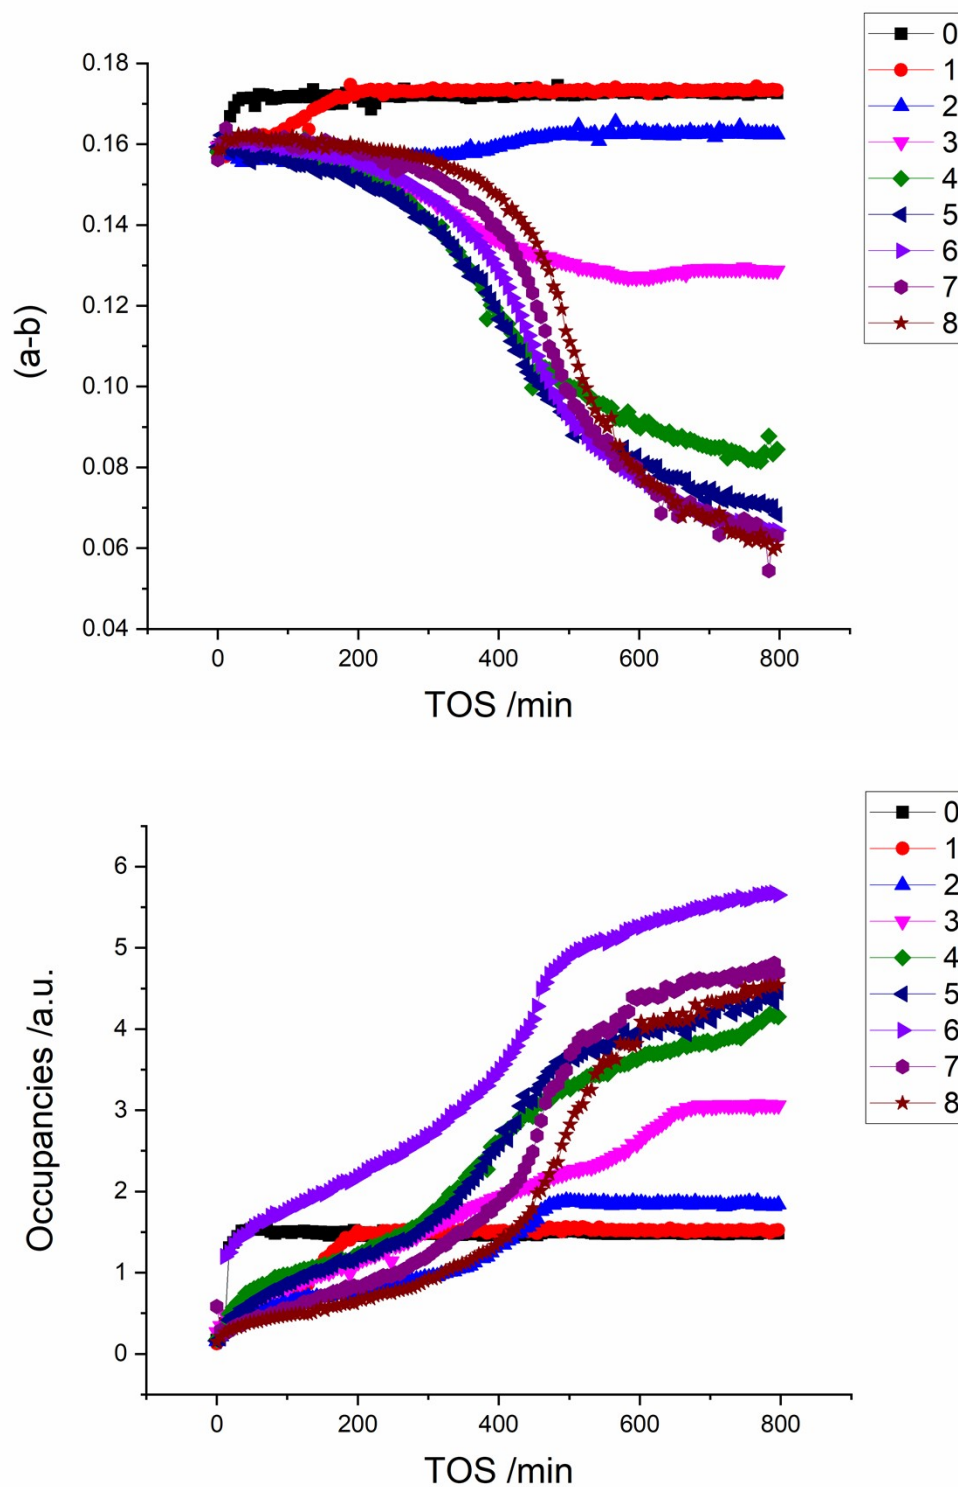

**Figure S2.** The  $a$  minus  $b$  parameter for the different layers of the catalytic reactor at increasing TOS (top). The total coke occupancies at increasing reaction times for the 10 reactor slices (bottom).

3. Temperature-programmed oxidation (TPO) monitored *via operando* XRD
- a. MS signal for CO<sub>2</sub>, evolution of the (*a-b*) parameter and unit cell volume evolution at increasing TOS for the H-ZSM-5 catalyst

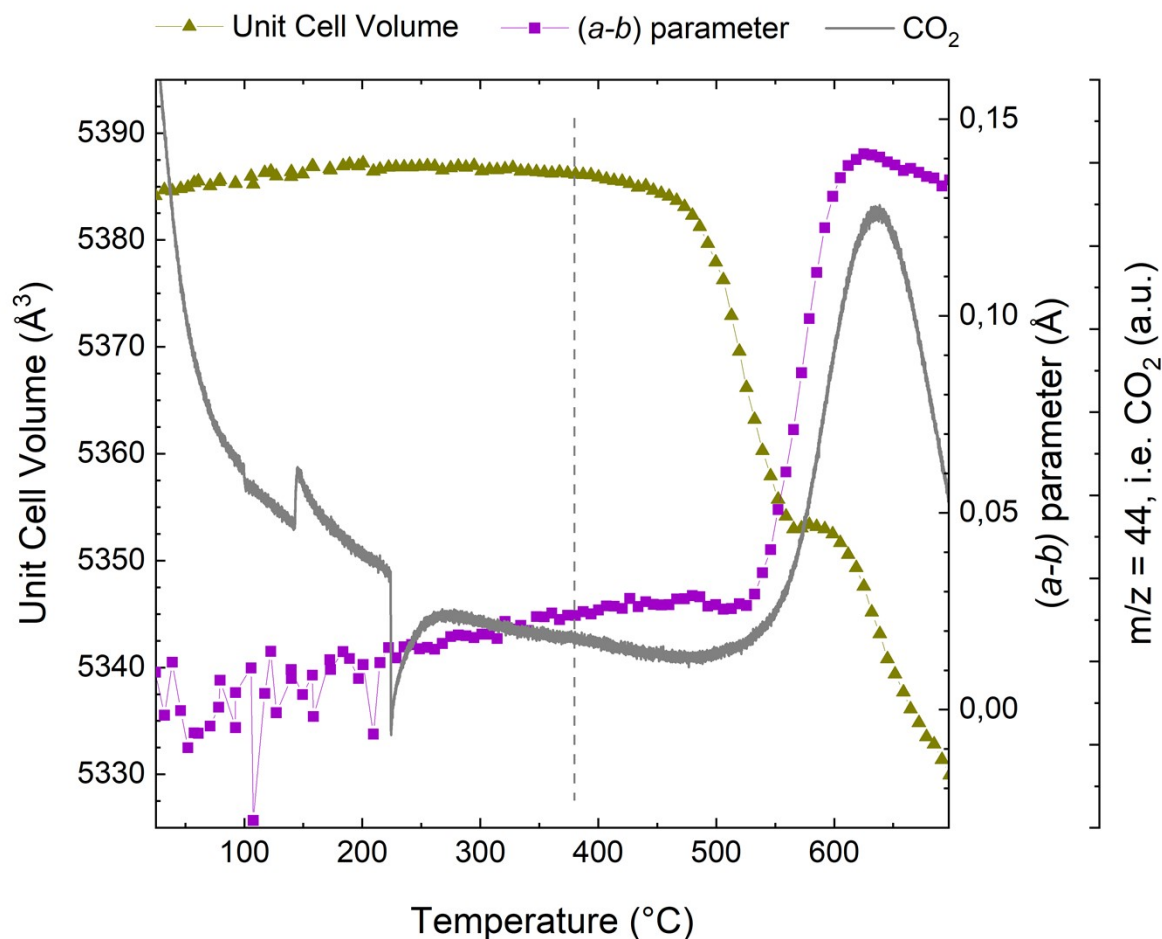

**Figure S3.** MS signal for CO<sub>2</sub>, evolution of the (*a-b*) parameter and unit cell volume evolution at increasing TOS for the H-ZSM-5 catalyst. The vertical dashed line indicates the data selected for Figure 2 in the main manuscript.

- b. Full scale evolution of individual coke occupancies within the H-ZSM-5 framework at increasing TOS and increasing temperature for the H-ZSM-5 catalyst.

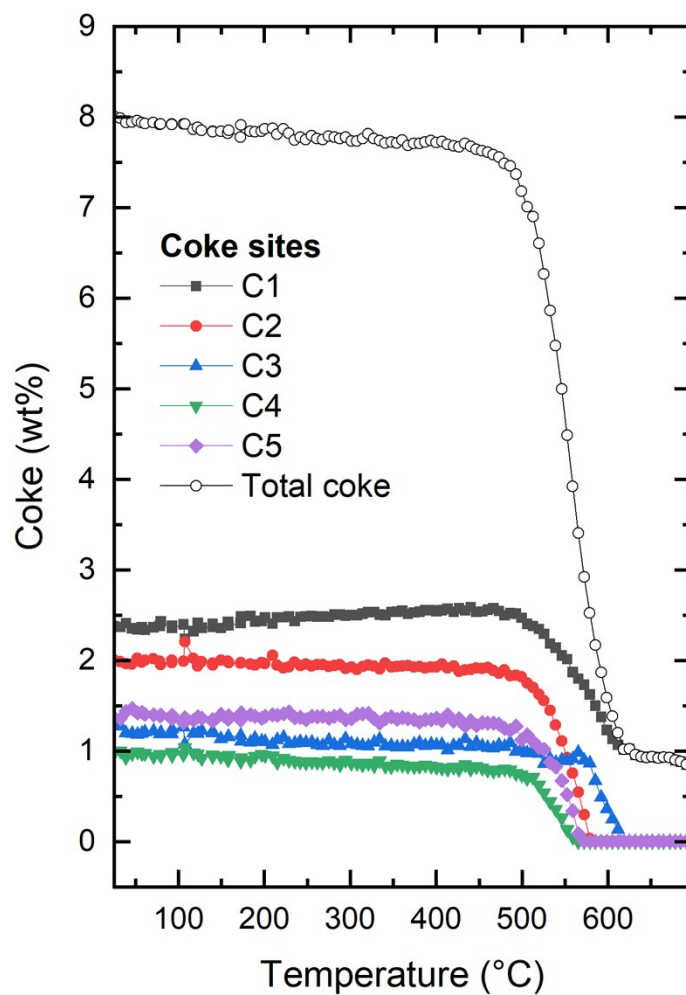

**Figure S4.** Full scale evolution of total coke and individual coke site occupancies within the H-ZSM-5 framework at increasing temperature.

c. Preferred sites of coke accumulation within the MFI framework.

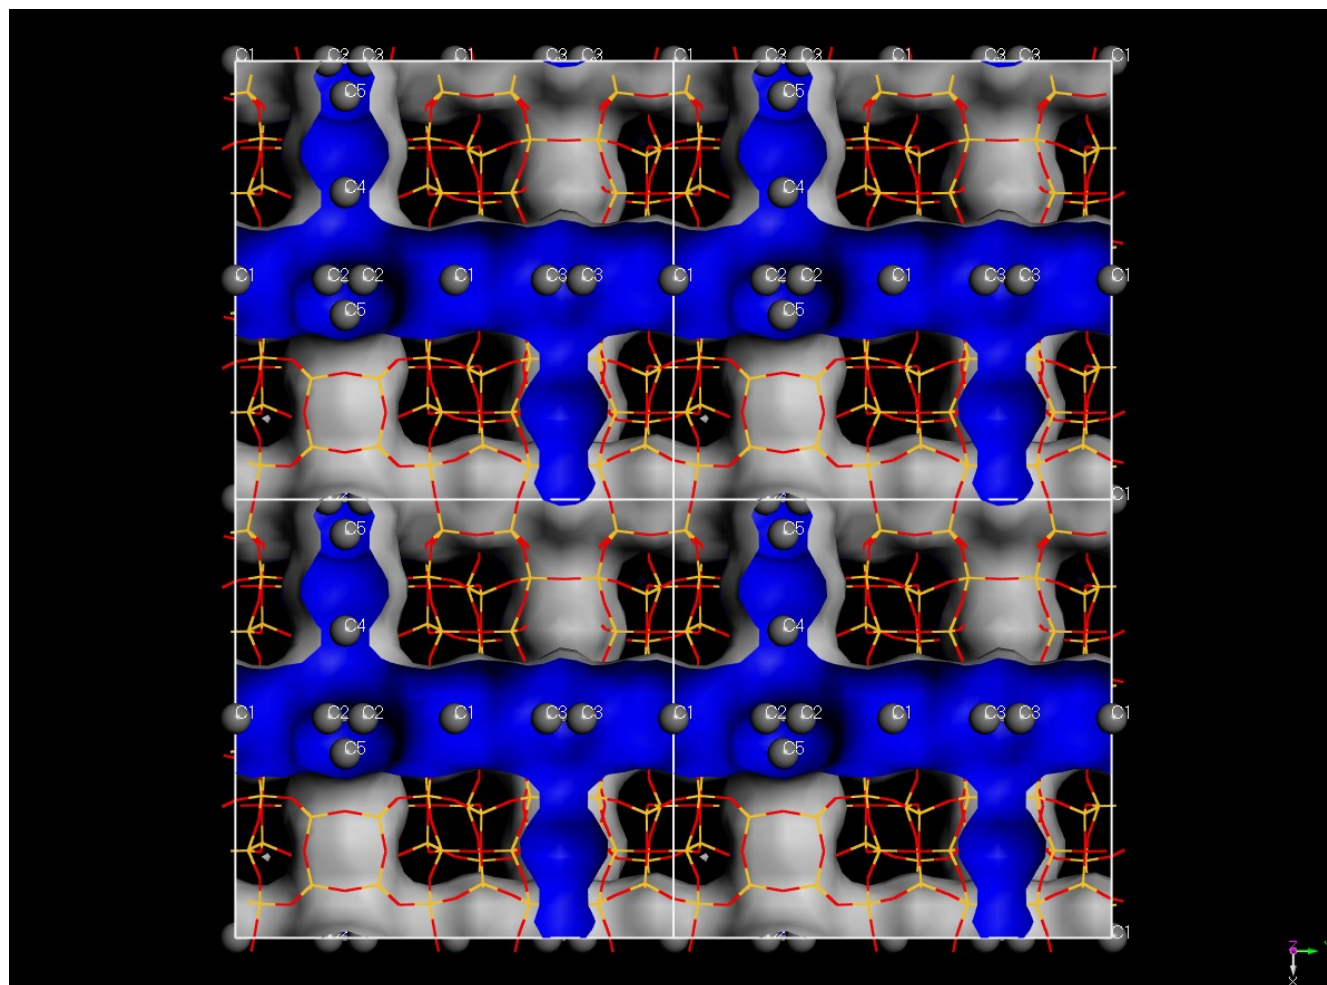

**Figure S5.** Preferential residing sites of coke in the straight channel and intersections of the MFI framework. The sites have been identified by extra-framework electron density distribution in the framework calculated by difference Fourier maps analysis during the Rietveld refinement analysis in TOPAS.

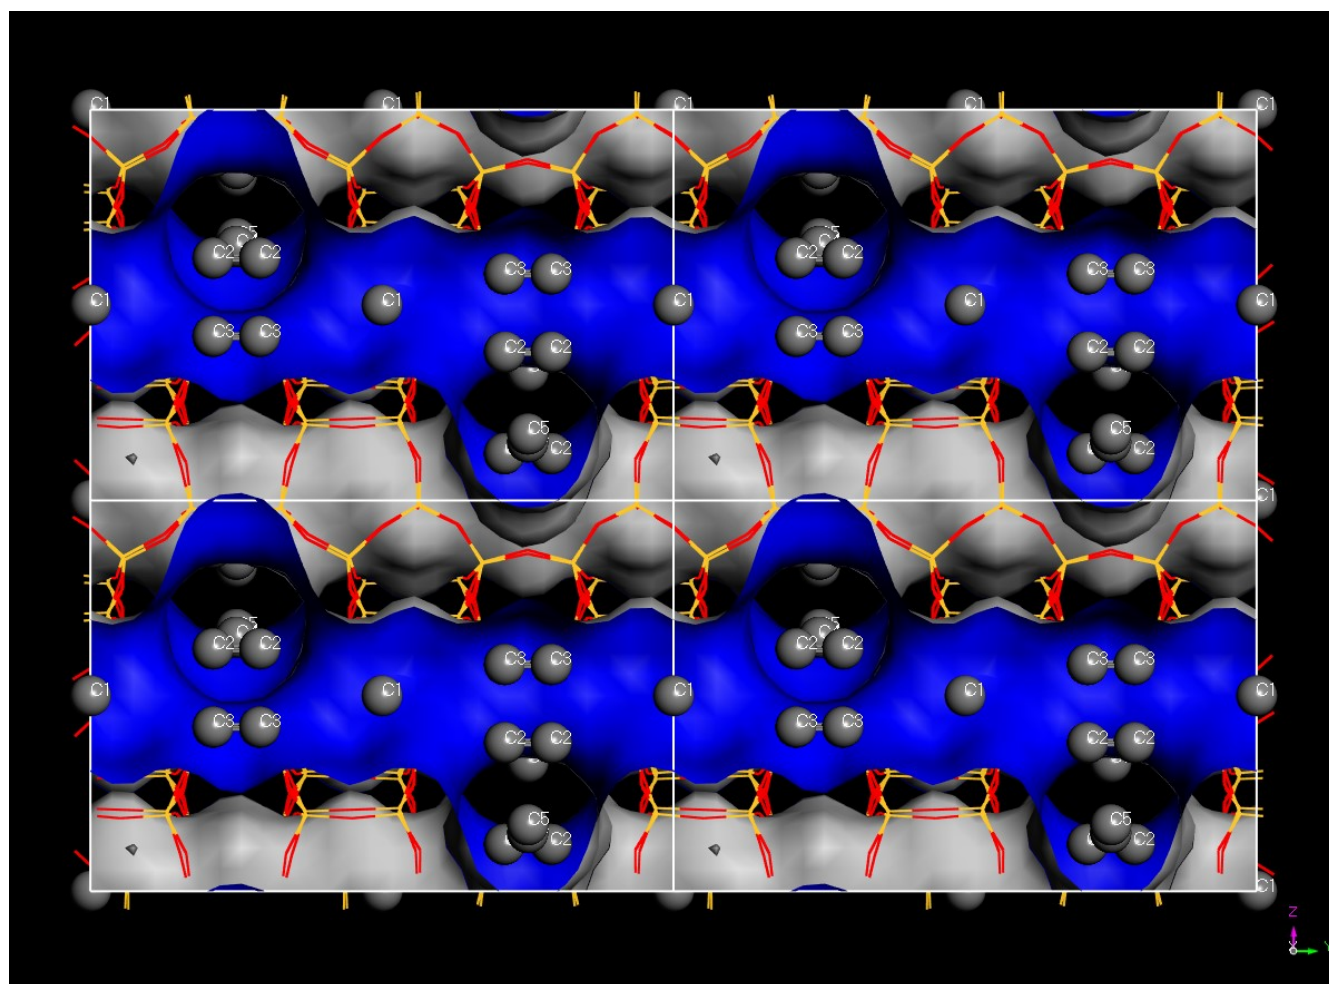

**Figure S6.** Preferential residing sites of coke in the straight channel and intersections of the MFI framework. The sites have been identified by extra-framework electron density distribution in the framework calculated by difference Fourier maps analysis during the Rietveld refinement analysis in TOPAS.

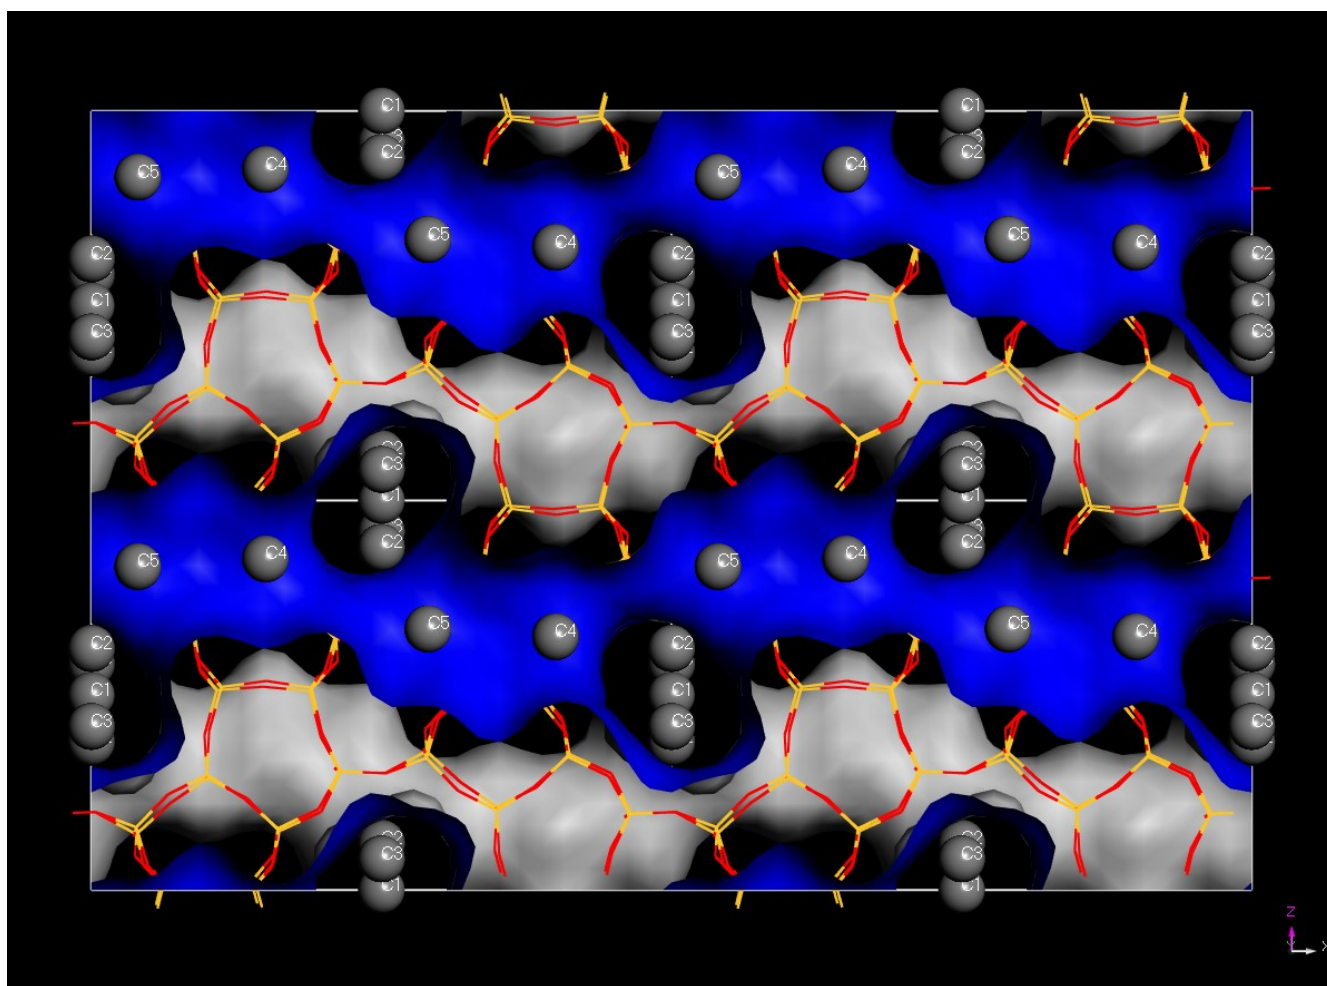

**Figure S7.** Preferential residing sites of coke in the zig zag channels and intersections of the MFI framework. The sites have been identified by extra-framework electron density distribution in the framework calculated by difference Fourier maps analysis during the Rietveld refinement analysis in TOPAS.

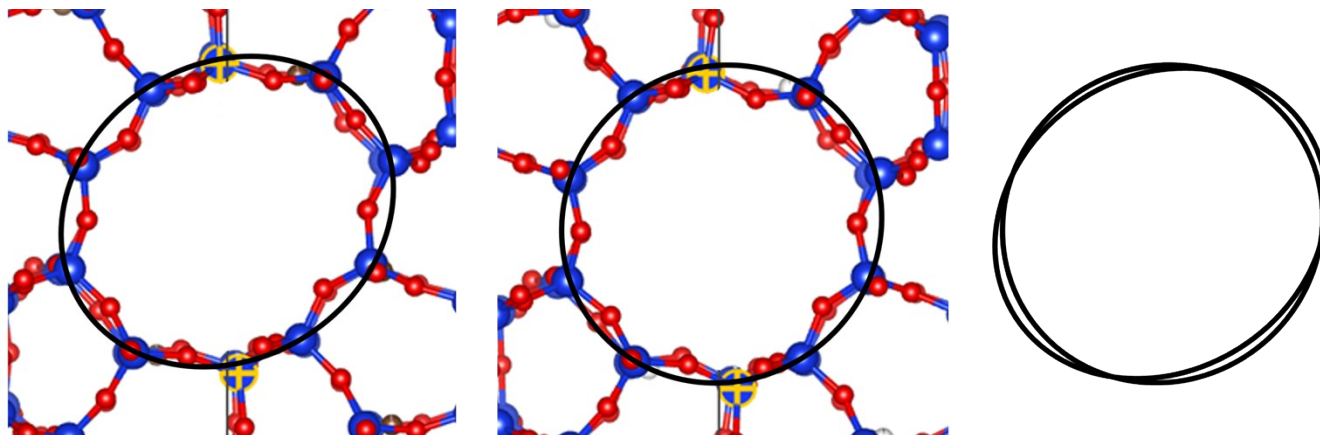

**Figure S8.** Detail highlighting the transition from an oval pore circumference of the straight channel to a more circular circumference upon coke removal. Left panel: Channel shape at 405 °C, i.e. fully coked. Middle panel: Channel shape at 625 °C, i.e. after removal of all coke by oxidation. Right panel: Overlay of the ovals used to outline channel shape in the two other panels.
